## Appendix 1. (Continued)

Leaking abdominal aneurysm in patient with decompensated congestive heart failure and atrial fibrillation

Yes  
☐No  
☐N/A  
☐

Confidential Comments:(will only be seen by the subject's Program Director)

Remaining Characters: 5,000

Check this box to certify that you are **Jonathan Wanderer** and confirm your digital signature for this document on 10/15/2013. ☐[Submit Final](#) | [Save Draft](#) | [Save Draft and Print](#) | [Submit as NET \(Not Enough Time\)](#)

## ANESTHESIOLOGY REFLECTIONS FROM THE WOOD LIBRARY-MUSEUM

## A Cocaine Beverage...from Brooklyn: Ola Laboratories' Spicy Blend of Cola, Coca, and Maté

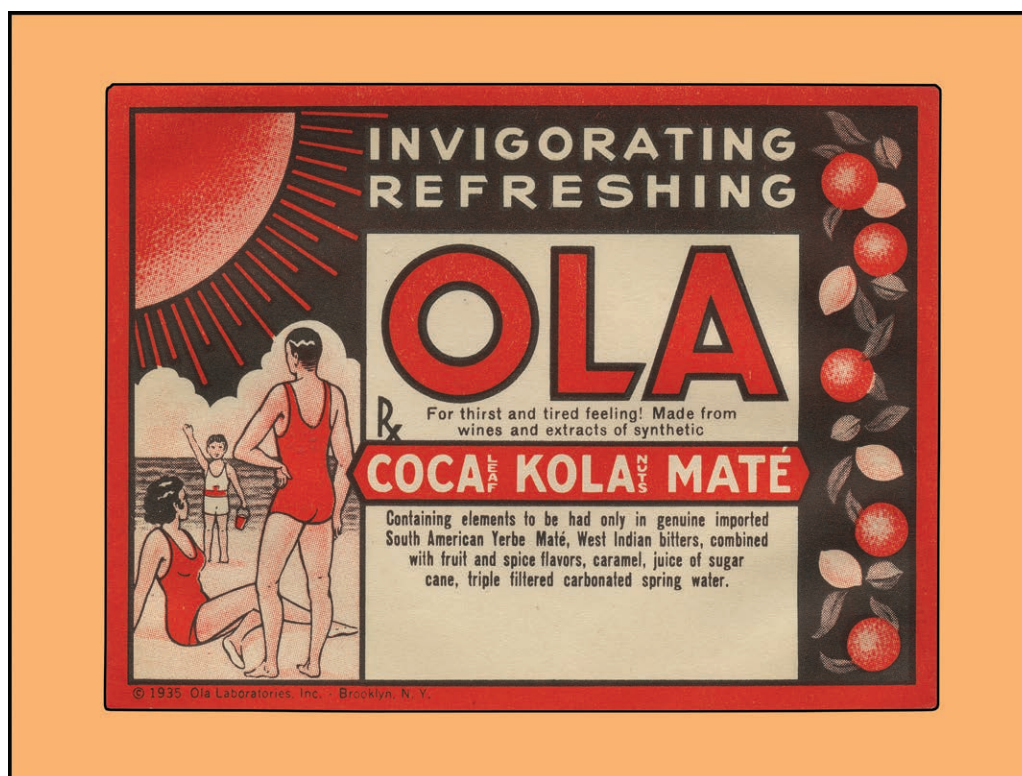

Even though the United States government had tightened restrictions on the public's access to cocaine and coca leaf products, Brooklyn's Ola Laboratories, Inc., copyrighted in 1935 its "invigorating" drink as "Ola" (above). The beverage blended "coca leaf, kola nuts, [and yerba] maté," flavored with fruit, spices, and bitters and combined with caramel, sugar cane juice, and carbonated water. By combining one of North Americans' most popular beverage combinations—cola with coca— with one of South Americans' favorites—yerba maté, Ola should have been a carbonated sales sensation. Instead its rollout fizzled, and the Brooklyn firm was absorbed by Len-Ola Laboratories. (Copyright © the American Society of Anesthesiologists' Wood Library-Museum of Anesthesiology.)

George S. Bause, M.D., M.P.H., *Honorary Curator and Laureate of the History of Anesthesia, Wood Library-Museum of Anesthesiology, Schaumburg, Illinois, and Clinical Associate Professor, Case Western Reserve University, Cleveland, Ohio.* UJYC@aol.com.
